# Supplementary material
Source: PubMed Central journal article supplement (PMC2999491)

**Supplemental Figure 1.** Differentiation marker in VSMC exposed to aldosterone. A marker of VSMC differentiation, SMC-22, was visualized after immunoblotting of cell lysates from VSMC exposed or not to aldosterone (10nmol/L) for 18h. The membranes were then stripped and reprobed with anti- $\beta$ -actin. NS= no significant difference, when relative SMC-22 protein between VSMC exposed to aldosterone was compared to non exposed cells.

**Supplemental Figure 2.** Aldosterone has no enhancing effect on PDGF mediated signaling. Aldosterone (10nmol/L) was added for 18h then PDGF (10ng/ml) was added for the indicated times. Cell lysates were immunoblotted for pAkt and then reprobed using anti-  $\beta$ -actin antibody. For each data point the phosphorylated protein band intensities were quantified using scanning densitometry. The results are presented as the mean $\pm$ SEM of three independent experiments. NS= not significant.

**Supplemental Figure 3.** Effect of aldosterone on IRS-1 abundance. VSMC were exposed to aldosterone (10nmol/L) or medium alone for 18h. IRS-1 protein was determined by immunoblotting cell lysates with an anti-IRS-1 antibody. The membranes were then stripped and reprobed with anti- $\beta$ -actin. NS= no significant difference, when relative IRS-1 protein between VSMC exposed to aldosterone was compared to non exposed cells.

**Supplemental Figure 4.** The effect of actinomycin-D, eplerenone and anti $\beta$ -3 IgG on IGF-IR and IRS-1 phospho and total protein levels. VSMC were incubated with actinomycin-D or eplerenone or anti $\beta$ -3 IgG and then with IGF-I as indicated for Fig.6. IGF-IR (panels A-C) or IRS-1 (panels D-E) phospho and total protein levels were determined as described previously (Fig.6).

**Supplemental Figure 5.** The effect of NAC on IGF-IR and IRS-1 phosphorylation and protein. VSMC were incubated with NAC and aldosterone as described in Fig.7C and then IGF-I was added as in Fig.7D. The amount of IRS-1 phospho and total protein (panel A) was determined as described previously (Fig. 7E). The levels of IGF-IR phosphorylation and total protein (panel B) were determined as described in (Fig.7D).

**Supplemental Figure 6.** The enhancing action of aldosterone on IGF-I mediated AKT/MAPK signaling is inhibited by NAC. VSMC were incubated with NAC and aldosterone prior to stimulation with IGF-I and the levels of phospho AKT and MAPK were determined as described in Fig.8A.

**Supplemental Figure 7.** The enhancing action of aldosterone on IGF-I mediated signaling is inhibited by catalase. VSMC were incubated for 60minutes with or without catalase (50U/ml) and aldosterone (10nmol/L) for 18h before adding IGF-I (50ng/ml) for 5minutes. The levels of Akt and MAPK phosphorylation were assessed by immunoblotting. The blots were stripped and reprobed with anti- $\beta$ -actin. For each data point the phosphorylated protein band intensities were quantified using scanning densitometry. The results of three experiments are represented in graphs which show the ratio (mean $\pm$ SEM) of phosphorylated to total protein. \*\*\* $p$ <0.001, NS= not significant.

**SUPPLEMENTAL Figure 1.**

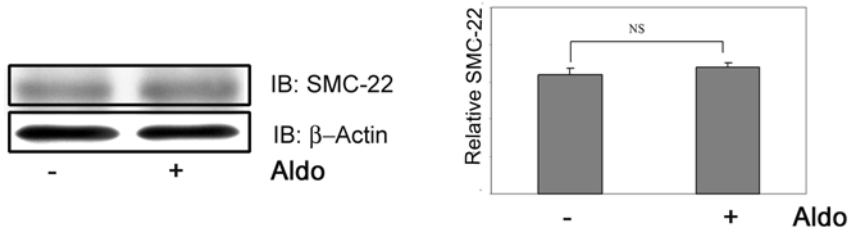

**SUPPLEMENTAL Figure 2.**

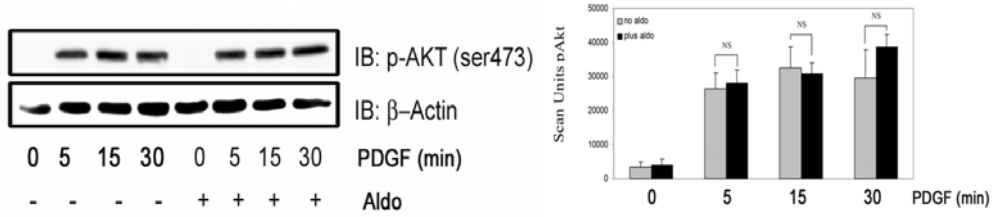

**SUPPLEMENTAL Figure 3.**

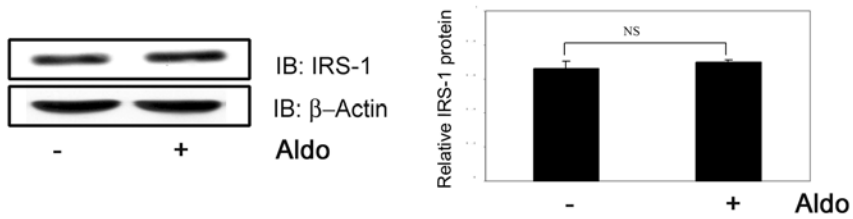

**SUPPLEMENTAL Figure 4.**

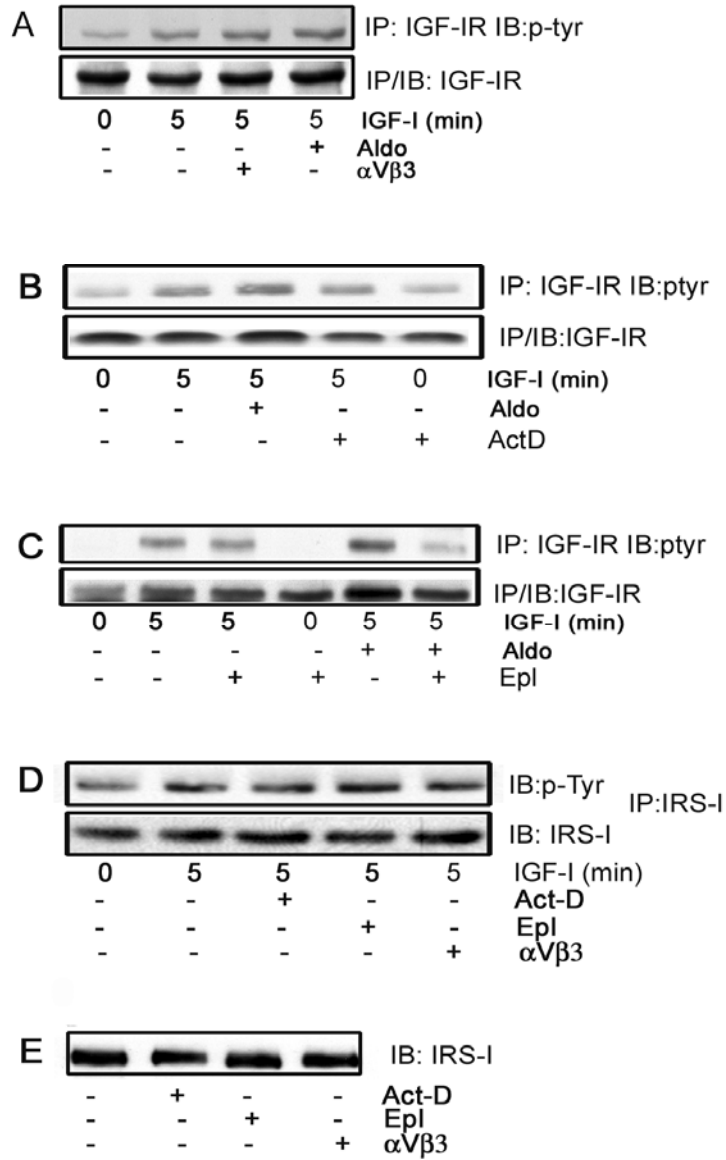

**SUPPLEMENTAL Figure 5.**

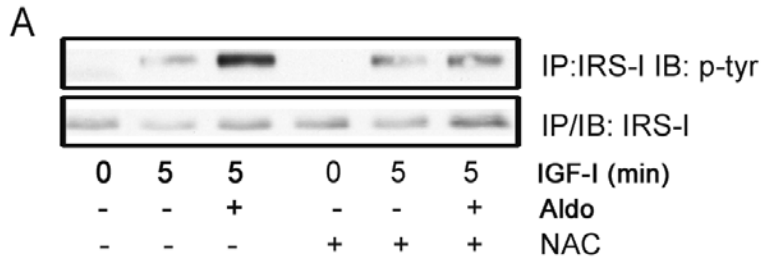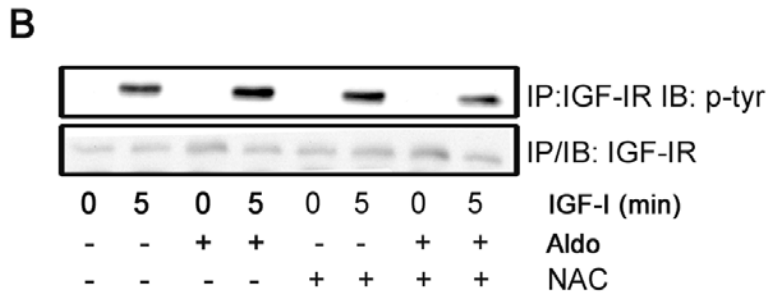

**SUPPLEMENTAL Figure 6.**

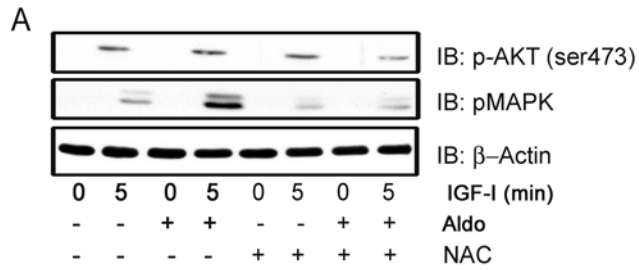

**SUPPLEMENTAL Figure 7.**

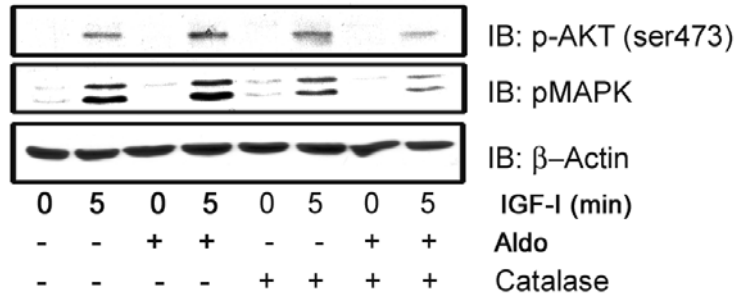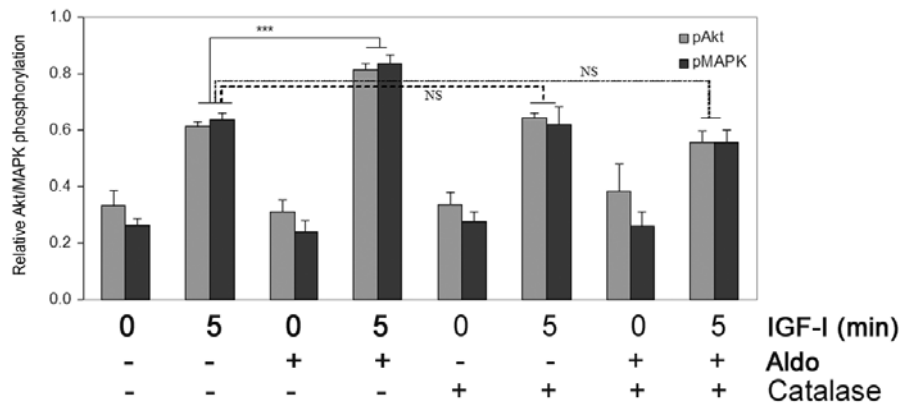

Supplement: en.2010-0350_1.pdf [file en.2010-0350_1.pdf]
